# Supplementary material for: Recessive pathogenic variants in MCAT cause combined oxidative phosphorylation deficiency
Source: eLife journal article supplement (doi:10.7554/elife.68047), 2023-02-16
Supplement: fig2-figsupp1-data1 [file Fig.2_Fig.Supp.1-source data 1.xlsx]

## Sheet: Sheet1
Figure panel	Protein	Controls	Patient
A	V-ATP5A	106	120
		104
		90
A	III-UQCRC2	Controls	Patient
		95	92
		109
		96
A	II-SDHB	Controls	Patient
		89	79
		107
		104
A	IV-COXII	89	39
		118
		92
A	I-NDUFB8	86	60
		117
		97
B	MCAT	Controls	Patient
		85	16
		112
		103
C	DLAT	Controls	Patient
		92	95
		106
		103
C	DLST	Controls	Patient
		93	94
		96
		111
D	V-ATP5A (F)	Controls	Patient
		106	113
		126
		114
		106
		47
D	III-UQCRC2 (F)	Controls	Patient
		77	29
		141
		104
		122
		55
D	II-SDHB (F)	Controls	Patient
		79	29
		120
		127
		107
		66
D	IV-COXII (F)	Controls	Patient
		77	15
		120
		109
		119
		75
D	I-NDUFB8 (F)	Controls	Patient
		77	18
		143
		126
		89
		64
