# Supplementary material for: Recessive pathogenic variants in MCAT cause combined oxidative phosphorylation deficiency
Source: eLife journal article supplement (doi:10.7554/elife.68047), 2023-02-16
Supplement: fig2-figsupp2-data1 [file Fig.2_Fig.Supp.2-source data 1.xlsx]

## Sheet: Sheet1
		Activity (mmol NADH min-1 mg-1)
MCAT patient	P1	3.97122
		3.79803
		5.09291
Controls	C1	4.06696
	C2	4.58316
		4.59932
	C3	5.55071
		5.46411
