# Supplementary material for: Recessive pathogenic variants in MCAT cause combined oxidative phosphorylation deficiency
Source: eLife journal article supplement (doi:10.7554/elife.68047), 2023-02-16
Supplement: fig2-figsupp3-data1 [file Fig.2_Fig.Supp.3-source data 1.xlsx]

## Sheet: Sheet1
Metabolomics data
Sample	P1-1	P1-2	P1-3	C5-1	C5-2	C5-3	C4-1	C4-2	C4-3	C3-1	C3-2	C3-3	C1-1	C1-2	C1-3	C2-1	C2-2	C2-3
Label	Proband	Proband	Proband	Control	Control	Control	Control	Control	Control	Control	Control	Control	Control	Control	Control	Control	Control	Control
LACTATE	0.0035	0.00413	0.00502	0.00283	0.00252	0.00287	0.00316	0.00207	0.00298	0.00257	0.00267	0.00256	0.00485	0.00249	0.00275	0.00272	0.00277	0.00294
OXOGLUTARATE	0.000119	9.83e-05	0.000157	0.000142	0.000154	0.000116	0.000124	5.86e-05	8.79e-05	9.69e-05	7.16e-05	0.000131	0.000225	0.000158	0.000132	0.000214	0.000229	0.000161
OXOADIPATE	6.49e-05	6.88e-05	7.67e-05	4.33e-05	6.45e-05	4.7e-05	5.78e-05	7.68e-07	9.56e-07	4.72e-05	5.97e-05	6.6e-05	0.000144	7.39e-05	5.43e-05	9.07e-05	5.81e-05	6.36e-05
