# Supplementary material for: Recessive pathogenic variants in MCAT cause combined oxidative phosphorylation deficiency
Source: eLife. 2023 Mar 7;12:e68047. doi: 10.7554/eLife.68047 (PMC9991045; doi:10.7554/eLife.68047)
Supplement: Figure 4—source data 3. [file elife-68047-fig4-data3.xlsx]

## Sheet: Sheet1
Time (minutes)	GFP								MCAT								MCAT + mtDSRed								MCAT+ WT								MCAT + T271I
1.31081	272.192	145.948	188.025	214.782	241.93	209.393			101.755	135.17868*	74.5211	118.548	126.918	102.014	82.733	75.3283	106.344	118.117	105.796	141.655	121.681	130.67	100.696	147.237	138.920216*	234.964	171.715	196.87	168.275	172.971	201.619	171.286	125.857	116.515	169.888	171.853	158.818	149.231	-147.06362*	191.866
7.768	250.606	154.176	185.936	202.01	230.358	193.672			94.7653	113.855402*	67.2331	111.971	132.67	91.2736	82.0802	78.0108	101.957	105.702	99.171	133.8	107.868	114.227	102.35	128.188	128.630853*	237.039	160.817	188.17	163.694	170.751	201.34	167.284	128.784	115.004	160.393	163.491	147.814	141.318	-151.840754*	184.682
14.2248	247.16	166.43	172.631	200.301	217.116	188.04			95.1211	101.661316*	64.5962	105.802	133.757	90.2706	75.2566	65.8458	94.8062	100.925	97.9854	122.998	103.001	110.279	94.2652	121.602	113.256706*	236.177	159.104	179.818	163.527	167.347	192.012	161.549	125.731	102.796	152.806	165.036	140.144	135.564	-157.998656*	176.475
20.7744	83.0394	84.9494	75.1362	81.3985	91.8179	71.3507			47.9457	58.444248*	20.4855	65.4315	75.2917	26.1323	33.9337	34.3515	52.3599	52.677	55.4992	65.9271	27.2306	48.9125	50.3501	55.6578	23.431082*	103.771	59.2107	73.4661	67.499	71.4399	71.5976	56.9192	53.6065	50.4231	70.986	82.3635	72.9878	55.4608	-262.723816*	66.6228
27.2257	88.2895	87.477	77.2454	76.5208	89.3889	66.8454			42.7588	37.867043*	17.4879	58.182	80.243	20.7106	28.9414	33.7979	52.0404	49.0724	55.2441	59.9101	39.4135	48.6869	42.24	51.5939	25.553519*	115.683	64.8072	68.7321	73.0573	69.0537	77.8153	56.1095	56.8655	40.6987	65.2773	85.1043	62.4849	53.3932	-270.190066*	59.9013
33.6804	83.6668	86.8082	73.6799	75.4362	94.2038	68.0065			44.9798	32.29856*	17.3968	60.6251	85.0934	20.9462	35.6913	31.5453	48.4191	49.0035	55.262	56.6812	43.8167	49.571	45.4719	43.1466	14.53126*	109.622	64.6229	72.9096	70.362	73.8389	75.4097	58.8754	58.0869	46.292	63.0157	86.653	62.6772	59.1787	-270.118604*	65.6298
40.2287	392.472	289.075	300.426	313.988	386.74	301.149			68.9675	101.953061*	62.4913	116.771	136.336	107.342	26.5559	80.1382	114.431	106.239	115.451	134.843	98.4736	136.397	145.235	145.004	53.836094*	433.744	362.248	385.453	325.455	339.583	416.849	338.209	209.553	200.346	269.444	280.888	265.563	238.689	1.962166*	364.882
46.6834	447.082	317.54	324.114	345.226	436.819	326.969			43.1492	47.591711*	61.8889	115.583	147.025	110.097	18.4672	62.326	117.447	106.886	114.18	139.612	120.014	132.281	129.392	152.214	7.620721*	445.523	362.194	381.103	342.72	340.8	406.218	338.455	218.155	194.22	262.647	285.77	243.661	228.032	-6.19292*	360.548
53.142	447.998	320.048	325.398	345.907	435.846	320.114			36.7474	35.800823*	65.3265	112.077	146.861	107.114	18.6522	56.0383	115.058	111.31	114.697	140.814	119.669	130.473	122.365	152.432	-0.701347*	447.535	362.923	388.234	341.158	340.898	415.942	344.831	221.585	198.933	269.039	289.896	235.267	228.65	4.50295*	364.221
59.691	58.4552	59.2206	46.0018	52.2538	55.6049	46.3861			22.9025	42.829382*	3.10025	46.5262	56.3253	6.82326	21.4358	23.4052	35.5424	36.432	39.1836	38.3076	8.56945	32.0192	35.5515	18.1686	-25.321938*	47.3378	40.8176	50.8046	43.0435	49.6704	43.2041	35.2096	35.4513	24.3128	45.3542	52.6895	46.8677	36.7296	-282.360517*	40.3165
66.1472	58.7978	61.3586	50.7669	61.2181	57.9174	41.9414			31.1262	22.016649*	0.282211	45.7981	67.3637	12.4798	21.172	24.2146	28.8481	30.4697	27.3725	34.0276	25.011	27.915	26.3016	16.9963	-30.494446*	40.9583	35.6927	40.5665	45.4003	47.8215	44.3084	27.5229	32.475	21.0635	42.6244	65.3371	37.8874	28.4426	-300.850602*	31.1154
72.6049	60.7061	56.7466	51.1334	55.1828	57.6558	45.5802			25.1388	8.422754*	0.879446	45.3907	59.9995	3.40159	14.8658	15.797	25.0723	29.3641	27.9457	36.2508	23.9785	25.0521	32.2689	14.5109	-32.851164*	40.4708	38.7008	34.9273	47.6557	43.759	40.033	27.7746	37.4626	24.9155	46.8623	69.2677	39.8008	26.1546	-302.405673*	39.3862
