# Supplementary material for: Recessive pathogenic variants in MCAT cause combined oxidative phosphorylation deficiency
Source: eLife. 2023 Mar 7;12:e68047. doi: 10.7554/eLife.68047 (PMC9991045; doi:10.7554/eLife.68047)
Supplement: Figure 4—source data 4. [file elife-68047-fig4-data4.xlsx]

## Sheet: Sheet1
Time (minutes)	GFP + mtDSRed								GFP + WT								GFP + T271I
1.31081	209.871	294.224	253.649	235.832	277.763	298.323	291.216	338.588	166.174	170.743	218.845	207.443	214.504	240.091	122.321078*	225.617	201.26	215.849	285.549	266.097	245.356	297.147	157.834	150.256535*
7.768	202.079	267.672	233.398	220.166	259.077	272.518	266.377	318.31	153.861	170.143	205.549	193.01	209.831	234.815	119.4583*	210.774	191.206	208.477	266.856	254.592	237.958	288.67	154.902	118.866781*
14.2248	195.165	263.552	229.856	218.857	250.888	268.61	261.819	312.001	148.206	166.023	200.91	184.916	204.099	230.544	115.343189*	208.061	183.264	206.102	262.122	250.508	234.224	287.108	152.708	115.139009*
20.7744	71.2273	95.9493	84.5019	92.3801	136.602	104.381	98.1074	114.485	72.4076	54.3537	75.8828	68.2662	76.8914	76.6004	11.496028*	68.1615	52.9783	72.9248	91.2511	84.7021	85.1682	88.142	58.1855	10.543992*
27.2257	66.8655	97.8483	77.0444	89.413	150.004	93.1259	92.502	111.626	76.8608	60.7205	71.6945	67.6874	74.3175	73.7934	6.319743*	67.6367	47.1346	67.3836	85.9859	72.3181	86.0451	86.4645	51.4419	-4.70322*
33.6804	64.9016	85.648	75.9297	88.9239	147.925	92.9663	91.9933	107.73	81.6635	60.5778	68.7242	65.2557	76.624	63.9388	10.307139*	65.7745	47.9637	65.3338	86.2794	78.5342	81.5433	89.9207	50.1071	-12.955514*
40.2287	386.219	405.493	419.751	346.703	464.32	401.726	433.029	547.255	316.496	346.048	288.464	278.953	296.409	331.822	253.579402*	346.028	353.293	368.065	473.425	466.423	421.891	549.224	270.126	229.683529*
46.6834	416.522	439.752	436.669	368.937	472.242	532.925	462.099	599.489	326.482	406.438	326.319	302.885	341.758	378.109	261.132238*	378.736	375.295	395.73	524.381	515.857	467.792	601.563	282.109	232.635222*
53.142	422.966	443.059	416.159	365.386	461.04	490.519	462.764	597.857	313.12	366.648	328.858	300.01	341.371	382.371	246.292951*	373.472	380.432	400.674	522.268	511.649	474.772	602.622	289.191	243.646379*
59.691	53.3491	64.2184	55.2812	65.1951	77.169	68.2689	63.3625	62.8605	33.2041	47.3843	47.1646	41.7923	50.9563	55.4567	-12.92892*	39.2493	40.5654	46.1379	49.055	49.0899	49.2896	47.537	36.0701	-40.085574*
66.1472	45.0909	58.4313	45.887	58.292	71.2938	62.9959	53.9834	59.1391	34.662	56.3725	46.5801	43.0835	48.7596	55.544	-9.14244*	45.4798	31.1574	44.1981	46.9703	46.8353	45.3188	52.6728	34.2249	-42.732587*
72.6049	47.5358	59.8231	46.4839	59.3628	66.9854	61.329	53.5667	56.0923	36.437	50.8506	47.7003	45.6908	53.1485	55.0955	-9.477106*	45.901	32.9494	40.3636	47.6399	49.6069	51.0368	52.4351	33.6319	-45.907689*
